# Supplementary material
Source: publisher figshare collection journal article supplement (https://f1000.figshare.com/ndownloader/files/1231302)
Supplement: Supplementary file 1 [file 1231302]

shudaprsd	key_press	instructions	fixation	letter_onscreen	stimulus_interval	RT	Hits	CRs	FAs	Misses	or	oh	HR	FAR	Z_HR	Z_FAR	d
0	6	2235.715	2303.682	2305.215	2305.748	1.053	35	198	41	25	1	0	0.58333	0.17083	0.21043	-0.95088	1.1613
0	6			2307.281	2307.815	0.592
0	6			2309.348	2309.881	0.459
1	8			2311.413	2311.946	0.427
0	6			2313.48	2314.013	0.487
0	8			2315.546	2316.079	0.419
0	6			2317.612	2318.146	0.58
1	8			2319.678	2320.211	1.056
1	6			2321.744	2322.277	1.662
1	8			2323.811	2324.344	1.131
0	6			2325.877	2326.41	0.981
0	6			2327.942	2328.476	0.65
0	6			2330.009	2330.542	1.179
0	6			2332.075	2332.608	0.818
0	6			2334.142	2334.675	0.76
0	8			2336.207	2336.74	1.291
0	6			2338.274	2338.807	1.474
0	6			2340.34	2340.873	1.096
0	6			2342.406	2342.94	0.752
0	6			2344.472	2345.005	1.323
0	6			2346.538	2347.071	1.226
0	6			2348.605	2349.138	1.028
0	6			2350.671	2351.204	0.913
0	6			2352.737	2353.271	1.261
0	8			2354.803	2355.336	0.924
0	6			2356.869	2357.402	0.703
0	6			2358.936	2359.469	0.611
0	6			2361.002	2361.535	0.854
0	6			2363.067	2363.601	0.699
0	6			2365.134	2365.667	0.747
1	8			2367.2	2367.733	0.386
0	6			2369.267	2369.8	0.757
1	8			2371.332	2371.865	1.235
1	8			2373.399	2373.932	1.312
0	6			2375.465	2375.998	0.84
0	6			2377.531	2378.065	1.241
0	6			2379.597	2380.13	0.803
0	8			2381.663	2382.196	0.923
0	6			2383.73	2384.263	0.491
0	6			2385.796	2386.329	0.669
0	6			2387.861	2388.395	0.778
0	8			2389.928	2390.461	0.486
0	6			2391.994	2392.527	0.67
0	6			2394.061	2394.594	0.566
0	6			2396.127	2396.66	0.727
0	6			2398.192	2398.726	0.718
0	6			2400.259	2400.792	0.89
1	8			2402.325	2402.858	0.904
1	6			2404.392	2404.925	1.479
0	6			2406.457	2406.99	0.756
0	8			2408.524	2409.057	1.173
0	6			2410.59	2411.123	0.935
0	6			2412.656	2413.19	0.627
0	6			2414.722	2415.255	0.712
0	6			2416.788	2417.321	0.65
1	8			2418.855	2419.388	1.243
0	8			2420.921	2421.454	1.134
1	6			2422.986	2423.52	0.768
0	6			2425.053	2425.586	0.558
0	6			2427.119	2427.652	0.801
0	8			2429.186	2429.719	0.744
0	6			2431.251	2431.784	0.448
0	6			2433.317	2433.851	0.708
0	6			2435.384	2435.917	0.909
0	6			2437.45	2437.983	0.536
1	8			2439.516	2440.049	0.849
0	6			2441.582	2442.115	0.559
0	6			2443.649	2444.182	1.046
0	6			2445.715	2446.248	0.873
0	6			2447.781	2448.315	0.571
1	8			2449.847	2450.38	0.831
0	6			2451.913	2452.446	0.78
0	6			2453.98	2454.513	0.547
0	6			2456.046	2456.579	0.532
0	8			2458.111	2458.645	0.659
0	6			2460.178	2460.711	1.082
0	6			2462.244	2462.777	0.686
0	6			2464.311	2464.844	0.511
0	6			2466.376	2466.909	0.503
0	6			2468.442	2468.976	0.675
0	8			2470.509	2471.042	1.016
1	6			2472.575	2473.108	0.738
0	6			2474.641	2475.174	0.758
0	6			2476.707	2477.24	0.678
0	6			2478.774	2479.307	0.468
0	6			2480.84	2481.373	0.687
0	6			2482.905	2483.439	0.908
0	6			2484.972	2485.505	0.428
0	8			2487.038	2487.571	1.251
1	8			2489.105	2489.638	0.895
1	8			2491.171	2491.703	1.741
0	6			2493.236	2493.77	0.825
1	8			2495.303	2495.836	1.406
0	6			2497.369	2497.902	0.746
0	6			2499.436	2499.969	0.783
0	8			2501.501	2502.034	0.944
0	6			2503.567	2504.101	0.835
0	6			2505.634	2506.167	0.778
0	6			2507.7	2508.233	0.476
1	8			2509.766	2510.299	1.017
0	6			2511.832	2512.365	0.797
1	8			2513.899	2514.432	1.589
0	6			2515.965	2516.498	0.707
0	6			2518.03	2518.564	1.056
0	8			2520.097	2520.63	1.491
0	8			2522.163	2522.696	0.966
0	6			2524.23	2524.763	0.669
0	6			2526.295	2526.828	0.73
0	6			2528.361	2528.895	0.885
0	8			2530.428	2530.961	1.109
0	6			2532.494	2533.027	0.52
0	6			2534.56	2535.093	0.516
0	8			2536.626	2537.159	0.349
0	6			2538.692	2539.226	0.615
0	6			2540.759	2541.292	0.745
1	8			2542.825	2543.358	1.128
0	6			2544.891	2545.424	0.521
1	8			2546.957	2547.49	1.027
0	8			2549.024	2549.557	0.736
0	6			2551.09	2551.623	1.002
0	6			2553.155	2553.689	1.199
0	6			2555.222	2555.755	0.555
0	6			2557.288	2557.821	0.78
0	6			2559.355	2559.888	0.682
0	6			2561.42	2561.953	0.428
0	6			2563.486	2564.02	0.676
0	6			2565.553	2566.086	0.543
1	8			2567.619	2568.152	0.803
0	6			2569.685	2570.218	0.536
0	6			2571.751	2572.284	0.673
0	6			2573.817	2574.351	1.126
0	6			2575.884	2576.417	0.659
0	6			2577.949	2578.483	0.51
0	6			2580.016	2580.549	0.506
0	8			2582.082	2582.615	0.637
1	8			2584.149	2584.682	1.154
0	6			2586.215	2586.748	0.494
0	6			2588.28	2588.814	0.404
0	6			2590.347	2590.88	0.903
0	6			2592.413	2592.946	0.741
0	8			2594.48	2595.013	1.135
0	6			2596.545	2597.078	0.699
1	6			2598.611	2599.145	0.649
1	6			2600.678	2601.211	0.486
1	6			2602.744	2603.277	0.36
0	6			2604.81	2605.343	0.626
0	6			2606.876	2607.409	0.511
0	6			2608.942	2609.476	0.753
1	6			2611.009	2611.542	0.761
0	6			2613.074	2613.608	0.875
0	6			2615.141	2615.674	0.566
0	8			2617.207	2617.74	0.785
0	6			2619.274	2619.807	0.734
0	8			2621.339	2621.872	0.872
1	6			2623.405	2623.939	0.863
0	6			2625.472	2626.005	0.477
0	6			2627.538	2628.071	0.421
0	6			2629.605	2630.137	0.346
0	6			2631.67	2632.203	0.42
1	6			2633.736	2634.27	0.364
0	6			2635.803	2636.336	0.623
0	6			2637.869	2638.402	0.514
0	6			2639.935	2640.468	0.417
1	8			2642.001	2642.534	0.694
0	6			2644.067	2644.601	1.154
0	6			2646.134	2646.667	0.874
0	8			2648.199	2648.733	1.188
0	6			2650.266	2650.799	0.931
0	6			2652.332	2652.865	0.606
0	6			2654.399	2654.932	0.537
0	8			2656.464	2656.997	1.214
0	6			2658.53	2659.064	0.841
0	6			2660.597	2661.13	0.69
0	6			2662.663	2663.196	0.657
0	6			2664.729	2665.262	0.8
0	6			2666.795	2667.328	1.213
0	8			2668.861	2669.395	1.637
0	6			2670.928	2671.461	1.293
1	8			2672.994	2673.526	1.073
0	8			2675.06	2675.593	0.87
1	6			2677.126	2677.659	0.743
0	6			2679.192	2679.726	0.593
0	6			2681.259	2681.792	0.934
0	6			2683.324	2683.858	0.739
0	6			2685.391	2685.924	0.793
0	6			2687.457	2687.99	0.731
0	0			2689.524	2690.057	0
0	6			2691.589	2692.122	0.097
0	8			2693.655	2694.189	0.89
0	8			2695.722	2696.255	0.727
0	6			2697.788	2698.321	1.321
0	6			2699.854	2700.387	1.107
0	6			2701.92	2702.453	0.793
0	6			2703.986	2704.52	0.655
0	6			2706.053	2706.586	0.779
1	8			2708.118	2708.651	0.835
0	6			2710.185	2710.718	0.667
0	8			2712.251	2712.784	0.733
1	6			2714.317	2714.851	1.187
1	8			2716.384	2716.916	0.878
0	6			2718.449	2718.983	0.94
1	8			2720.516	2721.049	0.853
0	6			2722.582	2723.115	0.645
0	6			2724.649	2725.181	0.546
0	6			2726.714	2727.247	0.444
0	8			2728.78	2729.314	0.716
0	6			2730.847	2731.38	0.518
1	6			2732.913	2733.446	0.368
1	6			2734.979	2735.512	0.289
1	6			2737.045	2737.578	0.373
0	8			2739.111	2739.645	0.774
1	6			2741.178	2741.711	0.599
1	6			2743.243	2743.776	0.462
1	8			2745.31	2745.843	0.346
0	6			2747.376	2747.909	0.566
1	6			2749.442	2749.976	0.902
0	6			2751.508	2752.041	0.67
1	8			2753.574	2754.108	0.573
0	6			2755.641	2756.174	0.48
0	8			2757.707	2758.24	0.764
0	8			2759.773	2760.306	1.147
0	6			2761.839	2762.372	0.675
0	6			2763.905	2764.439	0.513
0	6			2765.972	2766.505	0.45
0	6			2768.038	2768.571	0.634
0	6			2770.104	2770.637	0.584
1	6			2772.17	2772.703	1.049
0	6			2774.236	2774.77	0.512
0	6			2776.303	2776.836	0.742
0	6			2778.368	2778.901	0.593
0	6			2780.435	2780.968	0.43
0	8			2782.501	2783.034	0.579
0	6			2784.567	2785.101	0.728
0	8			2786.633	2787.166	0.701
1	6			2788.699	2789.233	0.715
1	6			2790.766	2791.299	0.482
0	6			2792.832	2793.365	1.141
0	6			2794.898	2795.431	1.102
0	8			2796.964	2797.497	0.77
0	6			2799.03	2799.564	0.755
0	6			2801.097	2801.63	0.938
0	6			2803.162	2803.695	0.432
0	6			2805.229	2805.762	0.773
0	8			2807.295	2807.828	1.045
0	6			2809.361	2809.895	0.854
1	8			2811.428	2811.96	1.154
0	6			2813.493	2814.026	1.204
0	6			2815.56	2816.093	0.661
0	6			2817.626	2818.159	0.605
1	8			2819.692	2820.226	1.205
0	6			2821.758	2822.291	0.527
0	6			2823.824	2824.358	0.653
1	6			2825.891	2826.424	0.578
0	6			2827.957	2828.49	0.533
1	8			2830.023	2830.556	0.7
1	8			2832.089	2832.622	0.936
0	6			2834.155	2834.689	0.699
0	6			2836.222	2836.755	0.706
1	8			2838.287	2838.82	1.254
0	6			2840.354	2840.887	0.728
0	6			2842.42	2842.953	0.631
0	6			2844.486	2845.02	0.727
0	6			2846.552	2847.085	0.583
1	6			2848.618	2849.151	1.318
0	6			2850.685	2851.218	0.956
0	6			2852.751	2853.284	1.005
0	6			2854.817	2855.35	1.283
0	6			2856.883	2857.416	0.623
1	8			2858.949	2859.483	0.666
1	8			2861.016	2861.549	0.908
0	6			2863.082	2863.615	0.817
0	6			2865.148	2865.681	0.649
0	6			2867.214	2867.747	0.423
0	6			2869.28	2869.814	0.642
0	6			2871.347	2871.88	0.491
0	6			2873.412	2873.945	0.488
1	8			2875.479	2876.012	0.525
0	6			2877.545	2878.078	1.02
0	8			2879.611	2880.145	0.981
0	6			2881.677	2882.21	0.427
0	6			2883.743	2884.276	0.517
1	6			2885.81	2886.343	0.507
0	6			2887.876	2888.409	0.468
0	8			2889.942	2890.475	0.757
1	6			2892.008	2892.541	0.801
0	6			2894.074	2894.608	0.879
0	6			2896.141	2896.674	1.015
0	8			2898.206	2898.739	0.491
0	6			2900.273	2900.806	0.756
0	6			2902.339	2902.872	0.489
0	6			2904.405	2904.939	0.497
0	6			2906.471	2907.004	0.523
0	8			2908.537	2909.07	0.549
0	6			2910.604	2911.137	0.597
0	8			2912.67	2913.203	0.594
0	6			2914.736	2915.27	0.368
0	6			2916.802	2917.335	0.323
0	6			2918.868	2919.401	0.366
0	6			2920.935	2921.468	0.532
1	8			2923.001	2923.534	0.423
